# Supplementary figures and images for: Melanocortin receptors in rat liver cells: change of gene expression and intracellular localization during acute-phase response
Source: PubMed Central journal article supplement — Histochem Cell Biol. 2011 Dec 20;137(3):279–91. doi: 10.1007/s00418-011-0899-7 (PMC3312751; doi:10.1007/s00418-011-0899-7), 2011-12-20

Fig. S1

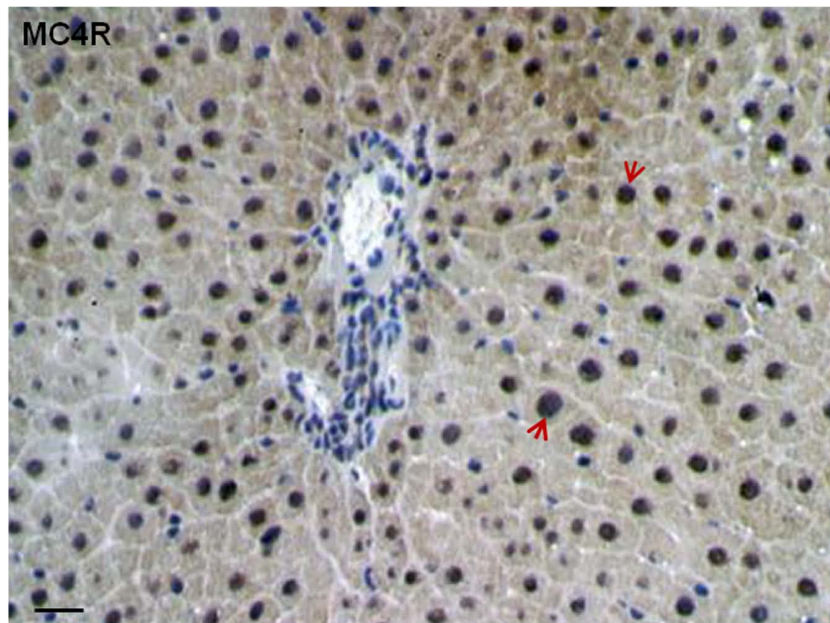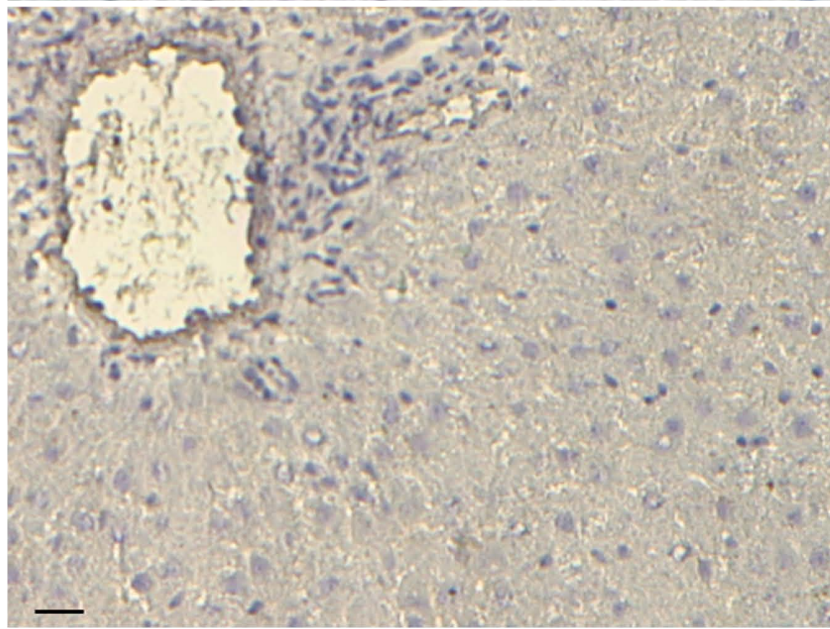

Supplement: 418_2011_899_MOESM1_ESM.pdf [file 418_2011_899_MOESM1_ESM.pdf]

Fig. S2

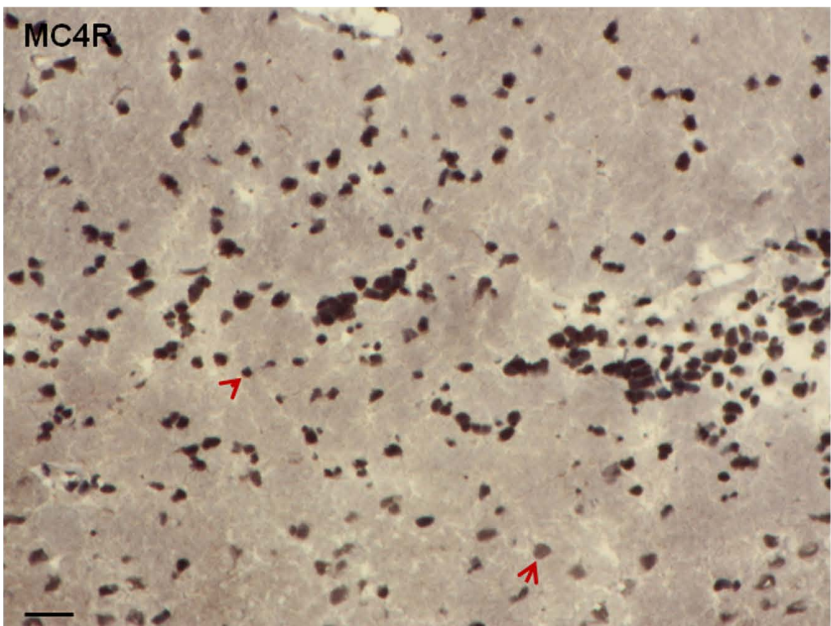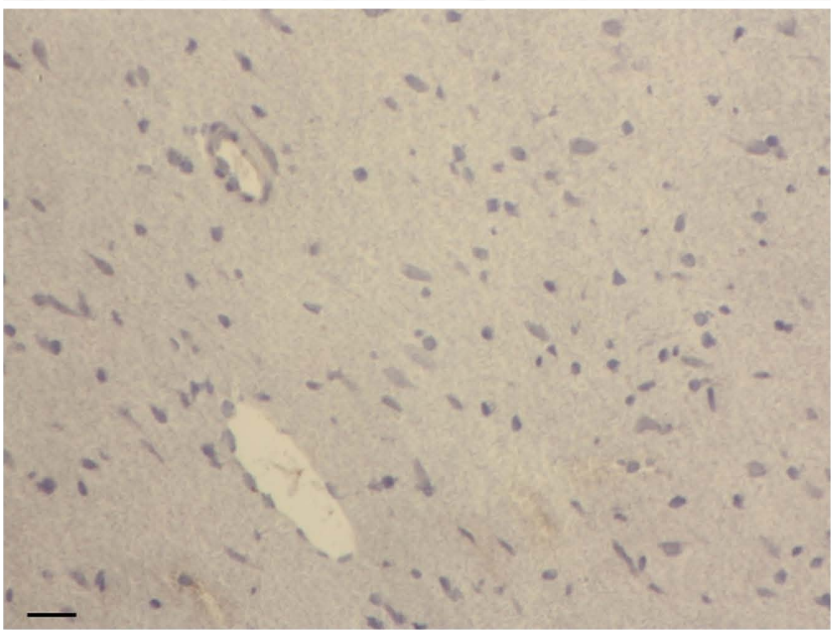

Supplement: 418_2011_899_MOESM2_ESM.pdf [file 418_2011_899_MOESM2_ESM.pdf]

Fig. S3

A

B

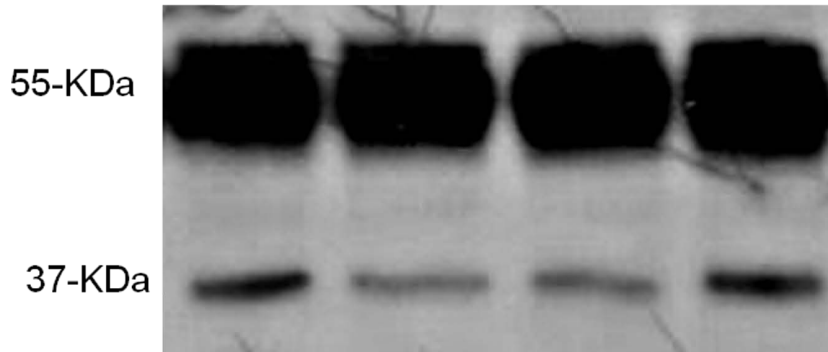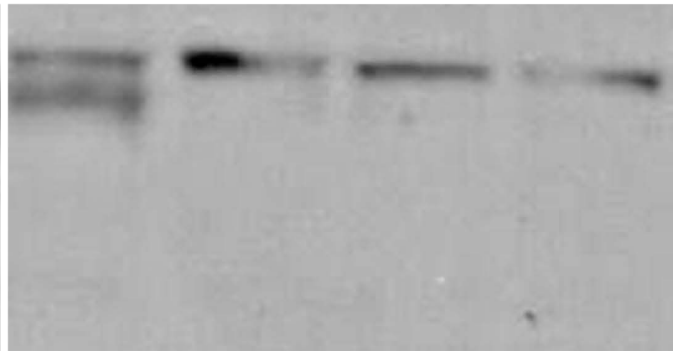

Supplement: 418_2011_899_MOESM3_ESM.pdf [file 418_2011_899_MOESM3_ESM.pdf]
